# Supplementary material for: Simultaneous determination of multi-class veterinary drug residues in different muscle tissues by modified QuEChERS combined with HPLC-MS/MS
Source: Royal Society of Chemistry journal article supplement (doi:10.1039/c4ay00589a), 2014-04-10
Supplement: c4ay00589a1.pdf [file c4ay00589a1.pdf]

**Table 1** Mass spectrometer parameters and LOQ for 55 veterinary drugs

| NO | Compound                    | Group         | EU MRLs <sup>a</sup><br>(µg kg <sup>-1</sup> )         | RT <sup>c</sup><br>(min) | Transition (CE)                  | Fragmentor<br>(V) | LOQ(µg kg <sup>-1</sup> ) |        |       |
|----|-----------------------------|---------------|--------------------------------------------------------|--------------------------|----------------------------------|-------------------|---------------------------|--------|-------|
|    |                             |               |                                                        |                          |                                  |                   | Porcine                   | Bovine | Ovine |
| 1  | Albendazole                 | Benzimidazole | 100 <sup>c</sup> , 100 <sup>d</sup>                    | 17.1                     | 266.1>234.1(20)*;266.1>191.1(35) | 160               | 5                         | 5      | 5     |
| 2  | Albendazole sulfone         | Benzimidazole | 100 <sup>c</sup> , 100 <sup>d</sup>                    | 11.1                     | 298.1>159.1(60)*;298.1>224.1(35) | 140               | 2.4                       | 2.4    | 2.4   |
| 3  | Albendazole sulfoxide       | Benzimidazole | 100 <sup>c</sup> , 100 <sup>d</sup>                    | 8.1                      | 282.1>240.1(15)*;282.1>208.1(40) | 80                | 2.8                       | 2.8    | 1.4   |
| 4  | Albendazole-2-amino sulfone | Benzimidazole | 100 <sup>c</sup> , 100 <sup>d</sup>                    | 4.4                      | 240.1>133.1(35)*;240.1>198.1(10) | 140               | 1                         | 1      | 1     |
| 5  | Febantel                    | Benzimidazole | 50 <sup>b</sup> , 50 <sup>c</sup> , 50 <sup>d</sup>    | 26.2                     | 447.2>383.1(10)*;447.2>415.1(15) | 100               | 1.8                       | 3.6    | 1.8   |
| 6  | Flubendazole-amine          | Benzimidazole | 50 <sup>b</sup>                                        | 10.7                     | 256.1>95.1(60)*;256.1>123.1(40)  | 160               | 2                         | 2      | 2     |
| 7  | Levamisole                  | Benzimidazole | 10 <sup>c</sup> , 10 <sup>d</sup>                      | 4                        | 205.1>178.1(20)*;205.1>91.1(45)  | 140               | 1                         | 1      | 1     |
| 8  | Mebendazole-5-hydroxy       | Benzimidazole | 60 <sup>d</sup>                                        | 9.8                      | 298.1>266.1(15)*;298.1>79.1(40)  | 100               | 2                         | 2      | 2     |
| 9  | Mebendazole-amine           | Benzimidazole | 60 <sup>d</sup>                                        | 9.6                      | 238.2>77.1(40)*;238.2>105.1(20)  | 160               | 2.4                       | 1.2    | 1.2   |
| 10 | Oxfendazole                 | Benzimidazole | 50 <sup>b</sup> , 50 <sup>c</sup> , 50 <sup>d</sup>    | 12                       | 316.1>159.1(25)*;316.1>191.1(10) | 160               | 1                         | 1      | 1     |
| 11 | Oxibendazole                | Benzimidazole | 100 <sup>b</sup>                                       | 11.7                     | 250.2>218.1(15)*;250.2>176.1(30) | 80                | 10                        | 10     | 10    |
| 12 | Thiabendazole               | Benzimidazole | 100 <sup>c</sup>                                       | 5.78                     | 202.1>175.0(30)*;202.1>131.1(35) | 100               | 10                        | 10     | 10    |
| 13 | Thiabendazole-5-hydroxy     | Benzimidazole | 100 <sup>c</sup> , 100 <sup>d</sup>                    | 3.9                      | 218.1>147.1(30)*;218.1>191.1(40) | 120               | 1.7                       | 1.7    | 1.7   |
| 14 | Clindamycin                 | Macrolide     | -                                                      | 12.4                     | 425.2>126.1(40)*;425.2>377.1(10) | 120               | 0.8                       | 0.8    | 0.8   |
| 15 | Josamycin                   | Macrolide     | -                                                      | 24.2                     | 828.5>174.1(30)*;828.5>109.1(55) | 200               | 0.6                       | 0.6    | 0.3   |
| 16 | Lincomycin                  | Macrolide     | 100 <sup>b</sup> , 100 <sup>c</sup> , 100 <sup>d</sup> | 4.7                      | 407.2>126.1(30)*;407.2>359.1(15) | 160               | 10                        | 10     | 10    |
| 17 | Roxithromycin               | Macrolide     | -                                                      | 23.4                     | 837.6>158.1(35)*;837.6>680.1(5)  | 140               | 1                         | 1      | 1     |
| 18 | Tiamulin                    | Macrolide     | 100 <sup>b</sup>                                       | 21.9                     | 494.3>192.1(20)*;494.3>119.1(45) | 160               | 4                         | 4      | 4     |
| 19 | Tylosin                     | Macrolide     | 100 <sup>b</sup> , 100 <sup>c</sup> , 100 <sup>d</sup> | 21.5                     | 916.5>174.1(30)*;916.5>773.1(50) | 240               | 5                         | 5      | 5     |
| 20 | Ciprofloxacin               | Quinolone     | 100 <sup>b</sup> , 100 <sup>c</sup> , 100 <sup>d</sup> | 6.7                      | 332.2>314.2(15)*;332.2>231.2(35) | 120               | 8                         | 8      | 8     |
| 21 | Difloxacin                  | Quinolone     | 400 <sup>b</sup> , 400 <sup>c</sup> , 400 <sup>d</sup> | 9.7                      | 400.1>382.1(20)*;400.1>356.1(15) | 140               | 5.6                       | 2.8    | 2.8   |
| 22 | Enoxacin                    | Quinolone     | -                                                      | 6.2                      | 321.2>303.1(10)*;321.2>232.1(30) | 120               | 3.6                       | 3.6    | 3.6   |
| 23 | Enrofloxacin                | Quinolone     | 100 <sup>b</sup> , 100 <sup>c</sup> , 100 <sup>d</sup> | 7.9                      | 360.2>342.1(10)*;360.2>316.1(10) | 140               | 2                         | 4      | 2     |
| 24 | Fleroxacin                  | Quinolone     | -                                                      | 6.4                      | 370.2>326.1(10)*;370.2>269.1(40) | 140               | 2.6                       | 2.6    | 2.6   |
| 25 | Flumequine                  | Quinolone     | 200 <sup>b</sup> , 200 <sup>c</sup> , 200 <sup>d</sup> | 18.5                     | 262.1>244.1(15)*;262.1>202.1(35) | 100               | 18.4                      | 18.4   | 18.4  |
| 26 | Lomefloxacin                | Quinolone     | -                                                      | 7.4                      | 352.2>308.1(10)*;352.2>265.1(40) | 140               | 2.6                       | 2.6    | 1.3   |
| 27 | Marbofloxacin               | Quinolone     | 150 <sup>b</sup> , 150 <sup>c</sup>                    | 6.3                      | 363.2>72.1(40)*;363.2>320.1(15)  | 120               | 1.7                       | 1.7    | 1.7   |
| 28 | Nalidixic acid              | Quinolone     | -                                                      | 17.2                     | 233.1>215.1(10)*;233.1>104.1(50) | 80                | 3                         | 3      | 3     |
| 29 | Ofloxacin                   | Quinolone     | -                                                      | 6.6                      | 362.2>318.2(10)*;362.2>261.1(40) | 140               | 4                         | 2      | 2     |
| 30 | Orbifloxacin                | Quinolone     | -                                                      | 8.2                      | 396.2>352.1(10)*;396.2>295.1(5)  | 140               | 0.7                       | 1.4    | 1.4   |
| 31 | Sarafloxacin                | Quinolone     | -                                                      | 9.5                      | 386.1>342.1(10)*;386.1>299.1(35) | 140               | 4                         | 2      | 2     |
| 32 | Sparfloxacin                | Quinolone     | -                                                      | 10                       | 393.2>349.1(15)*;393.2>292.1(20) | 120               | 1.4                       | 2.8    | 1.4   |
| 33 | Sulfamethazine              | Sulfonamide   | 100 <sup>b</sup> , 100 <sup>c</sup> , 100 <sup>d</sup> | 7                        | 280.0>186.0(10)*;280.0>156.1(10) | 80                | 2                         | 2      | 4     |
| 34 | Sulfabenzamide              | Sulfonamide   | 100 <sup>b</sup> , 100 <sup>c</sup> , 100 <sup>d</sup> | 12.4                     | 277.1>156.1(10)*;277.1>92.1(35)  | 80                | 10                        | 20     | 10    |
| 35 | Sulfacetamide               | Sulfonamide   | 100 <sup>b</sup> , 100 <sup>c</sup> , 100 <sup>d</sup> | 3.1                      | 215.0>92.1(5)*;215.0>156.1(20)   | 60                | 5.6                       | 5.6    | 5.6   |
| 36 | Sulfachlorpyridazine        | Sulfonamide   | 100 <sup>b</sup> , 100 <sup>c</sup> , 100 <sup>d</sup> | 8.6                      | 285.0>156.1(10)*;285.0>92.1(40)  | 80                | 4                         | 4      | 8     |
| 37 | Sulfadiazine                | Sulfonamide   | 100 <sup>b</sup> , 100 <sup>c</sup> , 100 <sup>d</sup> | 3.8                      | 251.0>156.1(15)*;251.0>92.1(40)  | 100               | 2.4                       | 2.4    | 4.8   |
| 38 | Sulfadoxine                 | Sulfonamide   | 100 <sup>b</sup> , 100 <sup>c</sup> , 100 <sup>d</sup> | 13.8                     | 311.1>156.1(10)*;311.1>92.1(10)  | 100               | 2                         | 4      | 4     |
| 39 | Sulfafurazole               | Sulfonamide   | 100 <sup>b</sup> , 100 <sup>c</sup> , 100 <sup>d</sup> | 10.9                     | 268.1>113.1(15)*;268.1>156.1(15) | 100               | 3.6                       | 3.6    | 7.2   |
| 40 | Sulfamerazine               | Sulfonamide   | 100 <sup>b</sup> , 100 <sup>c</sup> , 100 <sup>d</sup> | 5.3                      | 265.1>156.1(10)*;265.1>65.1(50)  | 80                | 2.4                       | 2.4    | 4.8   |
| 41 | Sulfameter                  | Sulfonamide   | 100 <sup>b</sup> , 100 <sup>c</sup> , 100 <sup>d</sup> | 7                        | 281.1>156.1(10)*;281.1>92.1(35)  | 100               | 1.3                       | 2.6    | 2.6   |

| NO | Compound           | Group            | EU MRLs <sup>a</sup><br>( $\mu\text{g kg}^{-1}$ )      | RT <sup>e</sup><br>(min) | Transition (CE)                  | Fragmentor<br>(V) | LOQ <sup>f</sup> ( $\mu\text{g kg}^{-1}$ ) |        |       |
|----|--------------------|------------------|--------------------------------------------------------|--------------------------|----------------------------------|-------------------|--------------------------------------------|--------|-------|
|    |                    |                  |                                                        |                          |                                  |                   | Porcine                                    | Bovine | Ovine |
| 42 | Sulfamethizole     | Sulfonamide      | 100 <sup>b</sup> , 100 <sup>c</sup> , 100 <sup>d</sup> | 7.2                      | 271.0>156.1(15)*;271.0>92.1(40)  | 80                | 4.6                                        | 4.6    | 9.2   |
| 43 | Sulfamethoxazole   | Sulfonamide      | 100 <sup>b</sup> , 100 <sup>c</sup> , 100 <sup>d</sup> | 9.6                      | 254.1>92.1(40)*;254.1>108.1(40)  | 100               | 2.2                                        | 4.4    | 4.4   |
| 44 | Sulfamonomethoxine | Sulfonamide      | 100 <sup>b</sup> , 100 <sup>c</sup> , 100 <sup>d</sup> | 6.9                      | 281.0>156.1(10)*;281.0>65.1(50)  | 100               | 1.5                                        | 3      | 6     |
| 45 | Sulfaphenazole     | Sulfonamide      | 100 <sup>b</sup> , 100 <sup>c</sup> , 100 <sup>d</sup> | 14.2                     | 315.1>158.1(30)*;315.1>131.1(50) | 120               | 4                                          | 4      | 4     |
| 46 | Sulfapyridine      | Sulfonamide      | 100 <sup>b</sup> , 100 <sup>c</sup> , 100 <sup>d</sup> | 4.8                      | 250.0>92.1(35)*;250.0>156.1(30)  | 80                | 2                                          | 4      | 4     |
| 47 | Sulfaquinoxaline   | Sulfonamide      | 100 <sup>b</sup> , 100 <sup>c</sup> , 100 <sup>d</sup> | 14.3                     | 301.1>156.1(10)*;301.1>92.1(30)  | 80                | 2                                          | 2      | 2     |
| 48 | Sulfathiazole      | Sulfonamide      | 100 <sup>b</sup> , 100 <sup>c</sup> , 100 <sup>d</sup> | 4.5                      | 256.0>156.1(15)*;256.0>92.1(40)  | 80                | 2                                          | 4      | 4     |
| 49 | Sulfisomidin       | Sulfonamide      | 100 <sup>b</sup> , 100 <sup>c</sup> , 100 <sup>d</sup> | 3.5                      | 279.1>186.1(10)*;279.1>124.1(5)  | 120               | 1.4                                        | 2.8    | 1.4   |
| 50 | Trimethoprim       | Sulfonamide      | 50 <sup>b</sup> , 50 <sup>c</sup> , 50 <sup>d</sup>    | 5.6                      | 291.1>230.1(20)*;291.1>123.1(25) | 120               | 5                                          | 5      | 5     |
| 51 | Cimaterol          | $\beta$ -agonist | -                                                      | 2.4                      | 220.1>160.1(10)*;220.1>143.1(40) | 80                | 0.1                                        | 0.1    | 0.1   |
| 52 | Clenbuterol        | $\beta$ -agonist | 0.1 <sup>b</sup>                                       | 9.7                      | 277.2>203.0(15)*;277.2>132.1(30) | 120               | 0.2                                        | 0.2    | 0.2   |
| 53 | Mabuterol          | $\beta$ -agonist | -                                                      | 11.1                     | 311.1>237.1(10)*;311.1>293.1(5)  | 100               | 0.1                                        | 0.1    | 0.1   |
| 54 | Ractopamine        | $\beta$ -agonist | -                                                      | 6.9                      | 302.2>107.1(35)*;302.2>121.1(20) | 120               | 1                                          | 1      | 1     |
| 55 | Salbutamol         | $\beta$ -agonist | -                                                      | 2.4                      | 240.1>148.1(10)*;240.1>166.1(15) | 80                | 0.1                                        | 0.1    | 0.1   |

<sup>a</sup> MRL: Maximum Residue Limits in porcine, bovine and ovine muscle from EU ( regulation 37/2010)

<sup>b</sup> Maximum Residue Limits in porcine muscle

<sup>c</sup> Maximum Residue Limits in bovine muscle

<sup>d</sup> Maximum Residue Limits in ovine muscle

<sup>e</sup> RT: retention time of analyte detected in standard solution

<sup>f</sup> LOQ( $\mu\text{g kg}^{-1}$ ): limits of quantification calculated as the concentration at S/N=10

-: no MRL has been established

\* Transition of quantitation ion; collision energies (eV) are given in brackets

**Table 2** Validation results of 55 veterinary drugs in three matrices

| NO | Compound                    | SL <sup>a</sup><br>(µg kg <sup>-1</sup> ) | Recovery <sup>b</sup> (rs <sup>c</sup> ) in Porcine (%) |         |         | Rs <sup>d</sup><br>(%) | Recovery <sup>b</sup> (rs <sup>c</sup> ) in Bovine (%) |         |         | Rs <sup>d</sup><br>(%) | Recovery <sup>b</sup> (rs <sup>c</sup> ) in Ovine (%) |         |         | Rs <sup>d</sup><br>(%) |
|----|-----------------------------|-------------------------------------------|---------------------------------------------------------|---------|---------|------------------------|--------------------------------------------------------|---------|---------|------------------------|-------------------------------------------------------|---------|---------|------------------------|
|    |                             |                                           | Low                                                     | Medium  | High    |                        | Low                                                    | Medium  | High    |                        | Low                                                   | Medium  | High    |                        |
| 1  | Albendazole                 | 50                                        | 95(16)                                                  | 65(21)  | 81(28)  | 48                     | 71(14)                                                 | 107(18) | 119(7)  | 29                     | 101(30)                                               | 124(20) | 91(15)  | 24                     |
| 2  | Albendazole sulfone         | 6                                         | 78(10)                                                  | 92(3)   | 113(5)  | 9                      | 86(4)                                                  | 115(7)  | 111(5)  | 12                     | 111(5)                                                | 91(6)   | 106(3)  | 8                      |
| 3  | Albendazole sulfoxide       | 7                                         | 85(10)                                                  | 82(7)   | 120(6)  | 10                     | 82(8)                                                  | 127(12) | 114(5)  | 15                     | 111(9)                                                | 100(8)  | 129(6)  | 7                      |
| 4  | Albendazole-2-amino sulfone | 10                                        | 67(6)                                                   | 88(4)   | 89(6)   | 4                      | 76(6)                                                  | 101(3)  | 95(5)   | 14                     | 83(6)                                                 | 83(7)   | 96(2)   | 7                      |
| 5  | Febantel                    | 18                                        | 69(12)                                                  | 61(25)  | 87(24)  | 31                     | 73(18)                                                 | 77(19)  | 107(12) | 22                     | 87(34)                                                | 111(30) | 95(4)   | 30                     |
| 6  | Flubendazole-amine          | 10                                        | 74(22)                                                  | 71(21)  | 69(32)  | 36                     | 73(9)                                                  | 119(33) | 100(8)  | 19                     | 87(22)                                                | 132(13) | 105(4)  | 21                     |
| 7  | Levamisole                  | 10                                        | 78(6)                                                   | 98(4)   | 105(4)  | 4                      | 90(6)                                                  | 116(2)  | 108(3)  | 15                     | 82(4)                                                 | 92(3)   | 107(12) | 4                      |
| 8  | Mebendazole-5-hydroxy       | 20                                        | 84(15)                                                  | 130(4)  | 97(8)   | 26                     | 83(16)                                                 | 115(11) | 108(3)  | 20                     | 126(10)                                               | 100(9)  | 109(5)  | 10                     |
| 9  | Mebendazole-amine           | 12                                        | 76(17)                                                  | 65(20)  | 70(26)  | 30                     | 79(10)                                                 | 106(24) | 101(8)  | 32                     | 136(19)                                               | 122(12) | 94(4)   | 14                     |
| 10 | Oxfendazole                 | 10                                        | 80(6)                                                   | 88(2)   | 102(5)  | 5                      | 81(7)                                                  | 106(6)  | 114(3)  | 7                      | 129(11)                                               | 96(8)   | 114(5)  | 8                      |
| 11 | Oxibendazole                | 100                                       | 97(13)                                                  | 84(12)  | 90(14)  | 18                     | 82(11)                                                 | 114(15) | 111(5)  | 18                     | 112(15)                                               | 117(10) | 108(7)  | 7                      |
| 12 | Thiabendazole               | 100                                       | 102(6)                                                  | 86(6)   | 109(3)  | 11                     | 117(7)                                                 | 107(7)  | 111(4)  | 7                      | 100(14)                                               | 82(10)  | 108(6)  | 15                     |
| 13 | Thiabendazole-5-hydroxy     | 17                                        | 78(5)                                                   | 84(12)  | 87(8)   | 13                     | 76(9)                                                  | 101(18) | 102(8)  | 18                     | 102(13)                                               | 77(7)   | 81(7)   | 9                      |
| 14 | Clindamycin                 | 8                                         | 73(18)                                                  | 73(4)   | 84(12)  | 13                     | 78(4)                                                  | 79(6)   | 94(3)   | 8                      | 81(12)                                                | 87(11)  | 92(16)  | 14                     |
| 15 | Josamycin                   | 3                                         | 105(14)                                                 | 72(12)  | 88(10)  | 16                     | 53(20)                                                 | 75(8)   | 90(7)   | 8                      | 114(20)                                               | 109(8)  | 130(12) | 11                     |
| 16 | Lincomycin                  | 100                                       | 43(14)                                                  | 44(2)   | 50(6)   | 16                     | 45(6)                                                  | 44(5)   | 52(6)   | 6                      | 36(8)                                                 | 41(10)  | 51(10)  | 15                     |
| 17 | Roxithromycin               | 10                                        | 83(11)                                                  | 84(15)  | 84(11)  | 14                     | 71(13)                                                 | 78(11)  | 99(8)   | 10                     | 119(14)                                               | 123(7)  | 109(5)  | 16                     |
| 18 | Tiamulin                    | 40                                        | 101(7)                                                  | 87(12)  | 89(17)  | 20                     | 90(11)                                                 | 94(11)  | 118(7)  | 15                     | 137(17)                                               | 129(8)  | 105(3)  | 16                     |
| 19 | Tylosin                     | 50                                        | 88(17)                                                  | 69(5)   | 78(11)  | 27                     | 66(20)                                                 | 72(11)  | 91(7)   | 9                      | 74(22)                                                | 82(9)   | 100(13) | 12                     |
| 20 | Ciprofloxacin               | 20                                        | 105(9)                                                  | 91(9)   | 96(7)   | 11                     | 122(9)                                                 | 96(17)  | 126(3)  | 15                     | 107(8)                                                | 119(11) | 127(10) | 13                     |
| 21 | Difloxacin                  | 14                                        | 90(12)                                                  | 95(2)   | 107(7)  | 9                      | 99(11)                                                 | 106(8)  | 116(6)  | 14                     | 100(12)                                               | 104(9)  | 99(4)   | 11                     |
| 22 | Enoxacin                    | 9                                         | 80(12)                                                  | 80(6)   | 86(4)   | 11                     | 66(25)                                                 | 84(6)   | 97(6)   | 10                     | 71(13)                                                | 90(9)   | 83(2)   | 11                     |
| 23 | Enrofloxacin                | 20                                        | 100(15)                                                 | 97(2)   | 101(6)  | 7                      | 94(8)                                                  | 94(10)  | 105(16) | 7                      | 90(8)                                                 | 101(7)  | 94(4)   | 10                     |
| 24 | Fleroxacin                  | 13                                        | 96(15)                                                  | 98(3)   | 101(2)  | 3                      | 94(6)                                                  | 95(6)   | 111(2)  | 10                     | 84(6)                                                 | 94(6)   | 106(8)  | 7                      |
| 25 | Flumequine                  | 184                                       | 97(12)                                                  | 101(5)  | 112(6)  | 7                      | 104(7)                                                 | 102(7)  | 126(2)  | 12                     | 116(7)                                                | 111(5)  | 101(6)  | 11                     |
| 26 | Lomefloxacin                | 13                                        | 95(11)                                                  | 92(4)   | 96(6)   | 6                      | 82(3)                                                  | 97(9)   | 117(4)  | 11                     | 85(10)                                                | 90(9)   | 83(7)   | 9                      |
| 27 | Marbofloxacin               | 17                                        | 84(12)                                                  | 93(3)   | 100(4)  | 3                      | 92(7)                                                  | 95(5)   | 109(3)  | 9                      | 79(5)                                                 | 93(5)   | 90(5)   | 7                      |
| 28 | Nalidixic acid              | 30                                        | 101(11)                                                 | 100(5)  | 118(9)  | 6                      | 107(6)                                                 | 98(9)   | 118(9)  | 8                      | 107(5)                                                | 108(4)  | 101(6)  | 14                     |
| 29 | Ofloxacin                   | 20                                        | 100(12)                                                 | 91(3)   | 99(5)   | 5                      | 86(9)                                                  | 96(5)   | 111(2)  | 7                      | 85(9)                                                 | 94(5)   | 97(5)   | 8                      |
| 30 | Orbifloxacin                | 7                                         | 94(13)                                                  | 101(3)  | 104(4)  | 5                      | 103(5)                                                 | 101(5)  | 115(7)  | 9                      | 76(4)                                                 | 94(7)   | 97(4)   | 7                      |
| 31 | Sarafloxacin                | 10                                        | 82(12)                                                  | 91(7)   | 94(9)   | 11                     | 82(23)                                                 | 97(11)  | 113(5)  | 13                     | 89(11)                                                | 96(14)  | 94(3)   | 15                     |
| 32 | Sparfloxacin                | 14                                        | 86(14)                                                  | 90(7)   | 96(11)  | 7                      | 94(12)                                                 | 101(8)  | 116(6)  | 8                      | 88(10)                                                | 94(10)  | 96(3)   | 9                      |
| 33 | Sulfamethazine              | 10                                        | 103(7)                                                  | 102(4)  | 102(4)  | 20                     | 85(9)                                                  | 95(6)   | 106(6)  | 15                     | 85(5)                                                 | 87(7)   | 96(2)   | 11                     |
| 34 | Sulfabenzamide              | 100                                       | 83(23)                                                  | 85(15)  | 99(12)  | 11                     | 99(5)                                                  | 95(19)  | 120(5)  | 20                     | 77(10)                                                | 106(13) | 103(6)  | 12                     |
| 35 | Sulfacetamide               | 14                                        | 71(18)                                                  | 113(11) | 106(7)  | 17                     | 69(17)                                                 | 84(17)  | 112(5)  | 16                     | 84(12)                                                | 104(14) | 106(10) | 17                     |
| 36 | Sulfachlorpyridazine        | 20                                        | 85(8)                                                   | 93(9)   | 99(11)  | 10                     | 106(9)                                                 | 94(17)  | 130(7)  | 13                     | 99(9)                                                 | 103(13) | 109(5)  | 11                     |
| 37 | Sulfadiazine                | 12                                        | 86(13)                                                  | 102(10) | 103(9)  | 15                     | 90(11)                                                 | 96(18)  | 126(8)  | 19                     | 96(10)                                                | 91(8)   | 104(4)  | 9                      |
| 38 | Sulfadoxine                 | 10                                        | 71(16)                                                  | 96(15)  | 105(14) | 13                     | 110(15)                                                | 95(20)  | 135(8)  | 21                     | 82(15)                                                | 103(15) | 97(6)   | 12                     |
| 39 | Sulfafurazole               | 18                                        | 96(14)                                                  | 92(10)  | 105(9)  | 7                      | 77(29)                                                 | 109(16) | 132(7)  | 12                     | 92(13)                                                | 90(10)  | 82(18)  | 11                     |
| 40 | Sulfamerazine               | 12                                        | 77(16)                                                  | 85(13)  | 93(6)   | 13                     | 82(13)                                                 | 88(15)  | 117(6)  | 16                     | 75(11)                                                | 92(8)   | 113(6)  | 8                      |
| 41 | Sulfameter                  | 13                                        | 83(15)                                                  | 92(9)   | 108(5)  | 10                     | 95(13)                                                 | 89(18)  | 128(6)  | 19                     | 70(9)                                                 | 93(10)  | 113(5)  | 9                      |

| NO | Compound           | SL <sup>a</sup><br>( $\mu\text{g kg}^{-1}$ ) | Recovery <sup>b</sup> (rs <sup>c</sup> ) in Porcine (%) |         |         | Rs <sup>d</sup><br>(%) | Recovery <sup>b</sup> (rs <sup>c</sup> ) in Bovine (%) |         |         | Rs <sup>d</sup><br>(%) | Recovery <sup>b</sup> (rs <sup>c</sup> ) in Ovine (%) |         |         | Rs <sup>d</sup><br>(%) |
|----|--------------------|----------------------------------------------|---------------------------------------------------------|---------|---------|------------------------|--------------------------------------------------------|---------|---------|------------------------|-------------------------------------------------------|---------|---------|------------------------|
|    |                    |                                              | Low                                                     | Medium  | High    |                        | Low                                                    | Medium  | High    |                        | Low                                                   | Medium  | High    |                        |
| 42 | Sulfamethizol      | 23                                           | 82(12)                                                  | 92(12)  | 103(11) | 15                     | 73(14)                                                 | 92(21)  | 130(8)  | 18                     | 89(14)                                                | 92(10)  | 111(9)  | 10                     |
| 43 | Sulfamethoxazole   | 11                                           | 98(14)                                                  | 92(9)   | 104(9)  | 7                      | 93(10)                                                 | 95(12)  | 132(5)  | 14                     | 107(27)                                               | 100(10) | 119(3)  | 8                      |
| 44 | Sulfamonomethoxine | 15                                           | 89(14)                                                  | 96(7)   | 96(7)   | 8                      | 87(14)                                                 | 104(14) | 125(4)  | 11                     | 70(9)                                                 | 93(8)   | 111(7)  | 7                      |
| 45 | Sulfaphenazole     | 10                                           | 80(29)                                                  | 84(20)  | 94(15)  | 10                     | 109(14)                                                | 102(23) | 136(7)  | 20                     | 78(20)                                                | 116(13) | 95(6)   | 15                     |
| 46 | Sulfapyridine      | 10                                           | 79(15)                                                  | 100(12) | 96(9)   | 12                     | 96(12)                                                 | 91(19)  | 131(7)  | 19                     | 85(6)                                                 | 103(8)  | 100(9)  | 8                      |
| 47 | Sulfaquinoxaline   | 10                                           | 71(26)                                                  | 72(22)  | 87(25)  | 20                     | 114(16)                                                | 97(28)  | 112(9)  | 27                     | 77(34)                                                | 104(22) | 104(9)  | 18                     |
| 48 | Sulfathiazole      | 10                                           | 85(14)                                                  | 87(15)  | 94(11)  | 21                     | 85(10)                                                 | 97(20)  | 131(10) | 19                     | 95(10)                                                | 84(14)  | 112(6)  | 12                     |
| 49 | Sulfisomidin       | 14                                           | 90(10)                                                  | 88(10)  | 94(7)   | 9                      | 89(8)                                                  | 89(20)  | 122(8)  | 17                     | 64(13)                                                | 79(10)  | 100(14) | 11                     |
| 50 | Trimethoprim       | 50                                           | 94(15)                                                  | 87(1)   | 101(5)  | 7                      | 83(18)                                                 | 108(5)  | 106(3)  | 10                     | 106(20)                                               | 88(7)   | 98(1)   | 8                      |
| 51 | Cimaterol          | 0.2                                          | 109(4)                                                  | 97(5)   | 97(4)   | 6                      | 107(20)                                                | 101(5)  | 110(7)  | 6                      | 85(7)                                                 | 89(6)   | 95(6)   | 9                      |
| 52 | Clenbuterol        | 0.4                                          | 118(8)                                                  | 108(6)  | 96(11)  | 11                     | 71(8)                                                  | 102(7)  | 92(7)   | 17                     | 92(17)                                                | 91(17)  | 117(12) | 19                     |
| 53 | Mabuterol          | 0.2                                          | 74(17)                                                  | 93(9)   | 103(7)  | 8                      | 89(16)                                                 | 108(12) | 101(2)  | 18                     | 91(12)                                                | 100(8)  | 112(6)  | 11                     |
| 54 | Ractopamine        | 10                                           | 74(4)                                                   | 88(7)   | 99(6)   | 9                      | 78(11)                                                 | 112(5)  | 106(6)  | 25                     | 90(15)                                                | 99(7)   | 96(6)   | 9                      |
| 55 | Salbutamol         | 0.2                                          | 83(8)                                                   | 87(10)  | 84(6)   | 11                     | 61(16)                                                 | 89(8)   | 89(9)   | 15                     | 59(15)                                                | 64(6)   | 85(4)   | 11                     |

<sup>a</sup>SL( $\mu\text{g/kg}$ ): spiked level is the concentration spiked to sample

<sup>b</sup>Recovery: the recovery of the spiked sample expressed as percentage

<sup>c</sup>rs(%): repeatability expressed as the relative standard deviation in three matrices (n=6) on 1 day

<sup>d</sup>Rs(%): reproducibility expressed as the relative standard deviation in three matrices (n=6) on 3 days
